# Supplementary material for: Prognostic and Therapeutic Potential of The OIP5 Network in Papillary Renal Cell Carcinoma
Source: Research Square preprint supplement (doi:10.21203/rs.3.rs-728952/v1), 2021-07-30
Supplement: Supplementary file 1 [file 6f39cb48440461522cc7fe9c.xlsx]

## Sheet: Table S1
Table S1. Enrichment of the C6 oncogenic gene sets collection within OIP5-related DEGs
pathway	pval	padj	ES	NES	size	leadingEdge
STK33_UP	0.00149477	0.014338	-0.523064	-2.14618	269	51351, 2920, 54453, 7980, 25943, 51313, 219285, 94241, 8491, 286148, 10135, 4254, 132864, 115548, 64718, 25897, 168455, 64089, 23657, 5756, 66036, 9732, 2919, 3572, 6781, 5328, 2921, 22862, 54532, 10254, 257068, 54813, 23253, 57728, 7832, 84542, 9076, 28962, 161742, 142891, 19, 3587, 161582, 2791, 153222, 2673, 55026, 9839, 151011, 26959, 221079, 6296, 201895, 55145, 80219, 4856, 132789, 92255, 2…
TBK1.DF_DN	0.00149477	0.014338	-0.564541	-2.32454	283	51575, 51101, 1525, 528, 79982, 54904, 26031, 7525, 10512, 102, 23527, 10142, 8436, 9748, 1825, 894, 5366, 55435, 7586, 1021, 55601, 55450, 59338, 10165, 23137, 83737, 8065, 55156, 65124, 10640, 79618, 51361, 55279, 7019, 23376, 79768, 140609, 4090, 10114, 5154, 4646, 9747, 114876, 51773, 23607, 11160, 663, 9818, 26060, 5611, 29110, 2957, 11212, 9360, 55320, 29766, 10198, 28996, 3673, 9475, 6645,…
STK33_NOMO_UP	0.00149925	0.014338	-0.5001	-2.05356	273	3554, 2920, 54453, 25943, 51313, 219285, 8491, 286148, 10135, 4254, 115548, 7525, 25897, 168455, 5756, 55293, 66036, 23362, 2034, 9732, 2919, 3572, 79660, 144811, 6781, 5328, 2921, 22862, 54532, 51762, 10254, 9690, 54813, 139231, 23253, 57728, 7832, 28962, 161742, 19, 3587, 161582, 2791, 153222, 2673, 55026, 9839, 151011, 26959, 221079, 6296, 219899, 55145, 80219, 132789, 284996, 143279, 8867, 10…
TBK1.DF_UP	0.00150376	0.014338	-0.400535	-1.64825	285	3554, 81031, 2920, 54453, 3576, 7079, 140885, 8795, 54629, 9388, 29967, 79666, 3480, 8601, 4603, 7039, 3685, 5533, 375449, 23333, 5328, 57157, 80205, 22978, 7128, 29887, 23080, 285203, 9765, 9648, 101, 28962, 5627, 50999, 55081, 2791, 5925, 10049, 9039, 26278, 27342, 10746, 7779, 4832, 1942, 7127, 8460, 80323, 2907, 79901, 6809, 5753, 2965, 115, 81831, 152559, 27445, 467, 23002, 66008, 5026, 2354…
STK33_SKM_UP	0.00152905	0.014338	-0.434569	-1.77231	265	51351, 338382, 7980, 94241, 9668, 286148, 10135, 4254, 132864, 115548, 64718, 25897, 64089, 23657, 5756, 6498, 65124, 5328, 11138, 10254, 257068, 54813, 57728, 7832, 84542, 9076, 142891, 160418, 7813, 3587, 161582, 2791, 153222, 3600, 221079, 339500, 201895, 55145, 171392, 11080, 4856, 92255, 283635, 54874, 23022, 10773, 7127, 79901, 50804, 7538, 9321, 10388, 55284, 50862, 137835, 7378, 4084, 263…
EGFR_UP.V1_DN	0.00157978	0.014338	-0.427673	-1.67928	188	51454, 120, 51427, 2969, 9687, 794, 22824, 3480, 25913, 889, 79718, 857, 323, 23678, 55601, 54898, 4698, 10793, 23314, 624, 26046, 27250, 54664, 9747, 288, 3983, 2146, 7456, 23165, 10395, 54892, 56521, 4147, 23312, 23683, 8204, 5567, 90806, 4832, 29994, 56603, 2852, 10964, 10388, 178, 84869, 10276, 56339, 55729, 3832, 799, 1960, 51375, 22836, 22875, 6744, 11201, 1299, 57396, 29919, 2059, 10125, 2…
ERB2_UP.V1_DN	0.00158983	0.014338	-0.631676	-2.48061	193	347902, 51454, 7980, 65986, 5577, 8491, 120, 51427, 79982, 51001, 9687, 794, 22824, 3480, 5965, 6782, 4603, 5366, 6542, 857, 55601, 55236, 8065, 6873, 25788, 4897, 1105, 26046, 8754, 23253, 7071, 1894, 3983, 7456, 10395, 50999, 55081, 11031, 10308, 1371, 64135, 55327, 64318, 1062, 10150, 10926, 4147, 79657, 10600, 51444, 8204, 79101, 27107, 7272, 2218, 80155, 56603, 55183, 2852, 64844, 10964, 111…
MEK_UP.V1_DN	0.00158983	0.014338	-0.508357	-1.99571	189	347902, 7980, 65986, 5577, 51427, 9687, 794, 22824, 3480, 25913, 4603, 26154, 323, 55601, 6873, 55119, 54332, 23314, 29887, 26046, 27250, 6814, 3983, 7456, 10395, 55081, 64135, 55327, 10905, 9039, 8821, 8204, 2218, 90806, 29994, 56603, 2852, 10964, 10388, 178, 55768, 10196, 2803, 253959, 221037, 84869, 56339, 9926, 5378, 467, 799, 1960, 54665, 22836, 6744, 11201, 51133, 1836, 79675, 1299, 3717, 4…
MTOR_UP.N4.V1_DN	0.00158983	0.014338	-0.425227	-1.66286	174	51351, 6328, 9962, 26235, 55450, 3280, 5966, 285203, 57337, 27250, 7832, 9648, 26054, 81627, 79800, 55320, 11179, 23169, 56257, 22807, 26959, 5896, 349152, 90806, 1901, 51306, 6655, 84124, 7903, 51809, 80778, 55729, 54014, 54585, 8875, 4361, 5429, 9742, 7678, 50861, 466, 55512, 57396, 1195, 51185, 1998, 373, 51752, 22838, 1657, 9662, 7035, 5334, 83990, 9884, 57730, 9975, 8336, 10957, 26137, 9665,…
RPS14_DN.V1_UP	0.00158983	0.014338	-0.426366	-1.66656	173	6328, 54453, 6347, 3576, 140885, 330, 182, 834, 29969, 64393, 10346, 1545, 3556, 5328, 54677, 5154, 27244, 57523, 11031, 55304, 3684, 214, 785, 23312, 151011, 6692, 5793, 10457, 7127, 6809, 57103, 3604, 1960, 3687, 54502, 3428, 10602, 4065, 5144, 8942, 1026, 7941, 22797, 3689, 51554, 9462
EGFR_UP.V1_UP	0.00159744	0.014338	-0.438947	-1.72144	186	3554, 6347, 3612, 6674, 1525, 3624, 25897, 64089, 23657, 5366, 1545, 2034, 5167, 2730, 93664, 65124, 22978, 11138, 6386, 10484, 64778, 27161, 9076, 6197, 10150, 1052, 3673, 151011, 30001, 8727, 2004, 3601, 259230, 23433, 9766, 9015, 80323, 81537, 65983, 9497, 3097, 116984, 2261, 6578, 5873, 444, 10451, 22936, 467, 4026, 1290, 6617, 7042, 56892, 11320, 23528, 10644, 5031, 9060, 10184, 9456, 3726, …
PIGF_UP.V1_UP	0.00159744	0.014338	-0.619249	-2.42854	186	51351, 7980, 4289, 27067, 794, 10142, 5756, 5965, 862, 23325, 6782, 113251, 4189, 114882, 3572, 5189, 23376, 10973, 4897, 140609, 10254, 8754, 6814, 50618, 23607, 6670, 80055, 5471, 5611, 221830, 50999, 9360, 3799, 1385, 9, 3673, 23212, 26278, 3091, 9652, 259230, 23012, 2861, 10914, 5567, 5980, 29994, 5321, 55183, 23382, 131544, 26036, 64844, 54505, 26019, 9321, 9169, 9655, 11342, 4976, 9497, 276…
LTE2_UP.V1_DN	0.0016	0.014338	-0.507143	-1.99067	191	347902, 7980, 79365, 55366, 23236, 2669, 5577, 182, 54809, 120, 51427, 2969, 79982, 9687, 794, 3480, 23657, 25913, 6782, 5366, 857, 55601, 54898, 3475, 79872, 3280, 10793, 29761, 23314, 1105, 26046, 2618, 6197, 9818, 4851, 7456, 10395, 2202, 11031, 64135, 4147, 7750, 64761, 51388, 94134, 8204, 2218, 9107, 55183, 2852, 10964, 51765, 1647, 221037, 5610, 9926, 467, 799, 1960, 10443, 9949, 6049, 2283…
PRC1_BMI_UP.V1_DN	0.00160514	0.014338	-0.432159	-1.67972	163	51351, 3576, 330, 65986, 1300, 10686, 79846, 55636, 26499, 5128, 894, 1021, 55117, 157567, 7128, 2982, 285203, 54813, 51199, 9818, 10560, 56521, 79772, 22807, 50863, 54848, 7644, 9625, 160518, 79661, 64167, 23507
RAF_UP.V1_DN	0.00161031	0.014338	-0.424941	-1.66272	185	51454, 5332, 65986, 23236, 51340, 4254, 2969, 22903, 9687, 794, 3480, 202, 4603, 26154, 5366, 6542, 857, 323, 54898, 6383, 6662, 54332, 23314, 6091, 27250, 3983, 10560, 28962, 10395, 55081, 4430, 55327, 50810, 56521, 80129, 214, 8727, 8821, 7227, 23022, 2852, 5357, 221037, 9926, 10451, 799, 1960, 390, 22836, 54541, 8942, 7042, 1299, 3717, 26130, 10265, 2820, 6938, 10125, 22876, 6566
VEGF_A_UP.V1_DN	0.00161551	0.014338	-0.511407	-2.00222	190	781, 51351, 4289, 4683, 56242, 7525, 5756, 5965, 6542, 23362, 55660, 7019, 23376, 140609, 10940, 8754, 90355, 80055, 9360, 9188, 11177, 1062, 10926, 3673, 23212, 8727, 26278, 1121, 9652, 7272, 2861, 10914, 2289, 5567, 262, 55183, 6675, 54505, 9169, 22878, 9801, 9497, 6102, 84830, 5922, 10153, 9411, 10463, 996, 10196, 4999, 444, 3843, 3161, 3832, 6885, 10762, 10051, 34, 390, 867, 7678, 6049, 10157…
P53_DN.V1_DN	0.00161812	0.014338	-0.397896	-1.55556	184	3554, 7980, 5332, 9770, 284217, 3676, 10584, 834, 10135, 6271, 6775, 23136, 9687, 83988, 8601, 10346, 231, 55117, 2919, 54898, 4747, 4897, 355, 9122, 7832, 9765, 10560, 8828, 7425, 4741, 760, 11257, 23433, 10457, 5321, 146712, 25797, 1687, 10154, 27040, 5136, 3428, 1643, 2744, 1026, 56271, 1836, 8535
HOXA9_DN.V1_UP	0.00161812	0.014338	-0.449366	-1.75679	184	3576, 8795, 51427, 5756, 64393, 10346, 1545, 23678, 23074, 157567, 57157, 22862, 10973, 29887, 27244, 8754, 355, 64778, 11160, 9765, 9818, 28962, 80173, 57763, 55081, 3587, 11179, 55757, 9958, 64761, 27347, 11257, 9583, 51278, 10140, 80219, 7779, 23287, 54505, 57103, 54480, 1647, 55284, 84124, 51809, 152559, 5271, 10443, 9778, 54502, 3428, 23405, 54877, 1147, 26034, 22797, 1836, 11010, 3717, 2612…
JAK2_DN.V1_DN	0.00164204	0.014338	-0.464778	-1.75832	135	91694, 1001, 4603, 2069, 25879, 55680, 286053, 80055, 79800, 8526, 80012, 440270, 472, 5820, 80005, 90338, 54799, 22807, 2825, 349152, 1842, 55591, 26263, 10773, 54507, 23731, 8910, 10003, 8034, 80167, 4249, 60412, 63971, 5991, 79598, 57711, 9988, 167153, 170960, 275, 23181, 29068, 80022, 25957, 54441, 9884, 57730, 95681
RB_P130_DN.V1_DN	0.00164745	0.014338	-0.498066	-1.87951	134	51575, 5921, 830, 56261, 10142, 23515, 4664, 55614, 79912, 8796, 23074, 55119, 9522, 7421, 51762, 10484, 23080, 285203, 55281, 253832, 1508, 55669, 26060, 57223, 3977, 7813, 129450, 5925, 23219, 201895, 6772, 6249, 84896, 114908, 1647, 23190, 2773, 60674, 25963, 81607, 64216, 83478, 80208, 51752, 55031, 11274, 203228, 11166, 55787, 25778, 2706, 91947, 57826, 84298, 8635, 55629
EIF4E_DN	0.00165837	0.014338	-0.48045	-1.73206	99	718, 9897, 137075, 7163, 1545, 55586, 9522, 5328, 79648, 8754, 355, 64778, 10087, 9743, 9685, 51742, 26019, 9321, 9903, 55023, 26751, 3840, 57700, 79668, 54477, 6617, 135112, 5743, 987, 54845, 4318, 54832, 57609, 90826, 55749, 23001, 57703, 55031
BCAT_BILD_ET_AL_DN	0.00167785	0.014338	-0.591984	-1.86021	45	23167, 3656, 3556, 2730, 55119, 7128, 4090, 23243, 79101, 51278, 5591, 55183, 114884, 9411, 2894, 55870, 23528, 9462, 1195
SRC_UP.V1_UP	0.00252525	0.0144393	0.398761	1.61706	151	8651, 4325, 56776, 320, 51659, 85012, 90522, 84279, 51761, 6608, 10814, 8086, 8625, 79751, 29763, 79058, 5300, 54814, 3069, 79022, 25999, 79085, 475, 79962, 80325, 374969, 2584, 2199, 6714, 8798, 126374, 221823, 10683, 29881, 29914, 339483, 6450, 2242, 4145, 339983, 596, 4987, 83743, 221476, 25830, 246329, 90427, 529, 10319, 970, 55150, 348013
RB_P107_DN.V1_UP	0.00254453	0.0144393	0.489478	1.94342	135	116372, 6586, 55723, 51393, 3959, 4174, 10516, 2237, 4240, 6241, 1277, 5424, 6117, 11167, 24137, 4171, 3151, 1278, 1907, 8318, 10549, 898, 56941, 3978, 1869, 51529, 10656, 72, 23474, 4175, 23397, 633, 5757, 284004, 1292, 1017, 9918, 975, 645, 2200, 8971, 79733, 7283, 2199, 1843, 7010, 93323, 8208, 84707, 27286, 55705, 3925, 121268, 2946, 80114, 5371, 125965, 94239, 5985, 9772, 7884, 51512, 2175, …
RB_P130_DN.V1_UP	0.00257069	0.0144393	0.430789	1.68451	123	7083, 5125, 10112, 197370, 5425, 54478, 10856, 53615, 362, 8303, 3835, 51433, 332, 126299, 6790, 9212, 60314, 84337, 11065, 6640, 79004, 7709, 57139, 84270, 9516, 9133, 2030, 8372, 23753, 6631, 1535, 6581, 4638, 5174, 9343, 10501, 840, 4879, 5438, 112616, 4998, 10468, 221178, 84303, 29127, 117581, 25804, 221421, 51207
MTOR_UP.V1_UP	0.00259067	0.0144393	0.375892	1.52307	154	1718, 54946, 2937, 50814, 4939, 1717, 2224, 4174, 9982, 6241, 991, 55287, 5833, 10008, 147, 51155, 29128, 163, 11230, 3949, 10801, 3430, 684, 4522, 4175, 115701, 11065, 4047, 5214, 136, 84709, 79639, 4835, 51477, 1592, 5550, 118881, 55313, 27346, 3925, 57496, 80222, 3422, 3162, 162427, 56649, 4648, 5327, 3064, 87769, 5578
WNT_UP.V1_UP	0.00259067	0.0144393	0.38805	1.57234	154	5570, 2810, 1718, 4681, 5800, 2149, 8906, 3569, 5425, 3934, 84258, 8303, 29785, 2342, 3748, 10982, 140467, 11226, 1141, 162, 6290, 4486, 29888, 4150, 10631, 29087, 9212, 1175, 219348, 10970, 7068, 5538, 3625, 23274, 6385, 9957, 6929, 79671, 3671, 222642
P53_DN.V1_UP	0.00260417	0.0144393	0.384091	1.61316	184	5493, 7162, 27063, 11339, 10529, 2152, 10874, 558, 1305, 7277, 3491, 3691, 652, 1012, 5754, 3913, 1278, 4052, 6567, 3866, 1281, 1112, 57228, 161291, 10656, 1474, 2752, 3880, 8218, 8536, 7739, 51599, 7026, 25999, 5467, 3625, 169611, 133, 56998, 5307, 136, 10267, 10524, 51308, 1365, 4212, 2898, 1266, 2199, 6385, 126353, 4610
PRC2_EED_UP.V1_DN	0.00261097	0.0144393	0.41666	1.75799	190	5347, 55723, 23400, 25789, 2068, 8906, 4174, 4597, 5905, 55663, 65989, 11145, 5424, 55643, 24137, 4171, 10295, 6813, 9900, 2026, 3300, 23649, 55057, 4605, 8318, 2194, 54496, 29763, 6319, 57192, 10844, 2771, 11151, 27254, 26007, 55222, 5210, 10460, 22994, 5091, 4047, 8189, 3625, 7517, 2584, 55139, 8971, 126353, 9394, 27037, 64852, 81570, 79447, 8208, 5822, 2355, 55388, 64780, 9064, 10868, 8438, 80…
ATF2_UP.V1_UP	0.00263158	0.0144393	0.420177	1.72138	162	81029, 116372, 27147, 7083, 79187, 320, 23400, 3814, 81887, 51659, 9982, 5050, 5424, 5331, 7226, 256227, 55702, 3310, 29925, 388569, 11226, 3978, 3237, 26094, 3887, 5300, 3855, 84034, 9328, 64785, 3384, 5307, 5731, 27043, 1146, 51308, 8823, 5888, 2021, 3671, 4133, 27344, 81491, 114088, 3231, 64220, 6524, 1280, 2305, 668, 6450, 23457, 2953, 9630, 79642
CSR_LATE_UP.V1_UP	0.00265957	0.0144393	0.449885	1.85621	168	896, 7076, 222865, 84798, 3814, 2997, 51659, 7277, 2237, 5708, 6241, 4828, 5424, 25844, 10726, 2193, 29114, 4605, 8402, 6611, 51155, 3835, 55859, 29128, 4172, 84823, 5536, 332, 10113, 11130, 5702, 4150, 10953, 4522, 4502, 4494, 3749, 990, 64785, 6627, 11065, 81610, 7223, 27065, 5036, 83716, 1841, 8662, 7278, 7283, 6484, 6723, 26155, 9138, 201254, 22919, 3608, 4314, 7222, 2305, 55143, 57019, 92856…
JNK_DN.V1_DN	0.00265957	0.0144393	0.405969	1.67501	168	22999, 90362, 27063, 3764, 5347, 2047, 1305, 4313, 7216, 26145, 5155, 4828, 5424, 29799, 8318, 256051, 3835, 4753, 9755, 10231, 5768, 710, 1890, 3425, 51760, 11037, 1428, 3636, 8266, 5198, 11065, 5914, 4900, 10524, 2701, 6461, 26469, 6714, 5333, 2677, 135138, 11040, 6663, 1033, 6445, 27289
RAPA_EARLY_UP.V1_DN	0.00268097	0.0144393	0.388133	1.60575	174	10518, 3814, 7466, 558, 81544, 51172, 3959, 587, 4920, 2896, 4281, 5076, 9368, 10024, 10295, 5549, 7226, 7515, 5869, 23038, 26001, 5727, 3590, 10158, 7106, 57060, 7728, 10120, 4926, 10226, 2752, 78992, 10013, 23397, 5662, 6640, 4258, 8729, 11007, 4000, 79068, 8175, 25841, 23130, 5742, 23225, 219, 2015, 26018, 2912, 6663, 7025, 65018, 23030, 23498, 6404, 859, 6794
RPS14_DN.V1_DN	0.00268097	0.0144393	0.409179	1.7098	182	7083, 5347, 10112, 79763, 10874, 79644, 51659, 2068, 4174, 2013, 1039, 5424, 55240, 991, 80020, 23481, 4605, 10534, 9156, 79094, 2639, 131601, 11004, 8078, 6535, 55222, 55466, 7280, 51116, 79711, 990, 23397, 51293, 50628, 5091, 9531, 9133, 2030, 54821, 89874, 79733, 7283, 1266, 210, 6723, 25959, 9238, 9700, 79767, 8891, 166647, 28992, 222642, 27079, 51083, 8706, 6274, 55388, 3196, 63826, 705, 623…
ESC_J1_UP_LATE.V1_UP	0.00268817	0.0144393	0.385475	1.59701	175	5270, 203447, 27063, 7138, 59084, 80201, 4616, 2152, 54463, 3123, 55890, 3491, 1282, 5025, 154796, 6695, 2934, 5641, 3855, 10266, 3880, 8974, 1140, 6928, 7286, 55640, 351, 633, 5156, 1601, 79971, 57190, 57139, 2487, 79710, 1284, 6764, 4647, 1592, 6948, 3487, 1512, 1410, 124872, 9957, 144165, 11135, 2719, 5652, 4668, 1604, 1075, 1280, 94234, 80114, 5654, 23423, 5092
SIRNA_EIF4GI_DN	0.00328947	0.0171784	-0.464992	-1.6657	94	6347, 3612, 8491, 4734, 10282, 114897, 29887, 140609, 10671, 51542, 10010, 56648, 55319, 10389, 1901, 6675, 51144, 9699, 80008, 493, 6732, 8767, 8076, 57030, 55093, 171546, 26128, 54942, 10644, 9060, 10274
PRC2_EED_UP.V1_UP	0.00476948	0.0238236	-0.390029	-1.52453	173	22903, 894, 55117, 157567, 23080, 5324, 5154, 54813, 9818, 28962, 441024, 7813, 9734, 11179, 56521, 219333, 79772, 116496, 7227, 2861, 5980, 29994, 7644, 6249, 54462, 23162, 57035, 11067, 3097, 9625, 93129, 571, 4034, 1997, 84869, 467, 50515, 57380, 10443, 54502, 6868, 27075, 83478, 23095, 8174, 84033, 5778, 8029, 10739, 152006, 23051, 2262, 55799, 6310, 9910, 55589
GCNP_SHH_UP_LATE.V1_UP	0.00481541	0.0238236	-0.385802	-1.50552	177	10528, 64921, 253943, 9962, 894, 5290, 7586, 54898, 26225, 6383, 57157, 2618, 22908, 117178, 122830, 79745, 84146, 55320, 29766, 10772, 80155, 54454, 6927, 4582, 9525, 25932, 83879, 9204, 8661, 29966, 10059, 8451, 9057, 6885, 3930, 10051, 10592, 79811, 10199, 83939, 55233, 1111, 7514, 6059, 84340, 23528, 4173, 166378, 80204, 26354, 57697, 1390, 51574
SIRNA_EIF4GI_UP	0.00496278	0.0239231	0.415201	1.54322	90	7138, 8839, 2937, 4841, 501, 292, 7508, 57175, 5160, 23344, 5859, 51016, 7385, 27335, 27065, 5720, 4728, 9918, 1512, 498, 64110, 4043, 25813, 3106, 1075, 5250
MEK_UP.V1_UP	0.00547945	0.0257534	0.361793	1.52553	194	7852, 23089, 2150, 23508, 10577, 6533, 27242, 51280, 9537, 4059, 53635, 3691, 11045, 5754, 79007, 1906, 2026, 8659, 23596, 23180, 439921, 29763, 79762, 3887, 80328, 113178, 11151, 5878, 6653, 29888, 3855, 10123, 7280, 404093, 726, 55640, 23406, 6277, 2052, 133, 360, 8714, 7077, 6484, 8611
STK33_NOMO_DN	0.00611621	0.0280451	-0.34862	-1.42158	263	56154, 55612, 55366, 23516, 79161, 22824, 3174, 10512, 4734, 154807, 132720, 5074, 55529, 202781, 202, 8658, 10100, 10687, 323, 9050, 22858, 120892, 23314, 23129, 134430, 9122, 114876, 153364, 374354, 441024, 30061, 214, 4147, 139886, 160335, 440, 80854, 1829, 222166, 5357, 148418, 81034, 6546, 114112, 55609, 688, 84144, 100133941, 9980, 150864, 3899, 90624, 25938, 383, 4756, 11320, 2823, 55916, …
CORDENONSI_YAP_CONSERVED_SIGNATURE	0.00737101	0.032994	0.473602	1.61899	57	6446, 27063, 7083, 4616, 2621, 558, 3491, 26227, 2013, 5376, 11167, 991, 6624, 332, 1031, 2316, 3693, 1601, 7057
KRAS.600.LUNG.BREAST_UP.V1_UP	0.00766871	0.0334996	-0.350868	-1.41069	235	2920, 51454, 3576, 330, 650, 9353, 3624, 79846, 9732, 2919, 6616, 25879, 6781, 3090, 2921, 7128, 4897, 101, 9734, 2791, 5959, 3673, 1780, 50863, 80008, 7869, 2113, 5649, 160518, 10371, 9971, 7185, 6364, 201191, 6804, 383, 5743, 4914, 83478, 1299, 4318, 81789, 55001, 2670
ESC_V6.5_UP_EARLY.V1_DN	0.00787402	0.0334996	0.358727	1.47175	161	2150, 2810, 54946, 8618, 558, 2997, 3491, 1282, 652, 389058, 5376, 2634, 1277, 2707, 3490, 2709, 1278, 2934, 1281, 2637, 29842, 3880, 84617, 165, 284119, 26270, 351, 25792, 633, 6277, 3625, 1284, 360, 4054, 308, 2199, 7077, 3371, 11135, 1363, 1301, 151887, 55697, 84667, 5654, 5546, 5054, 112616, 9314, 128553, 4648, 11285, 2596, 2012
CSR_EARLY_UP.V1_UP	0.00805153	0.0334996	-0.387902	-1.50105	159	51105, 5782, 3624, 4907, 10921, 168850, 6662, 6781, 90874, 7071, 92597, 84933, 22894, 6921, 9188, 219333, 7532, 285672, 9883, 51388, 6731, 8204, 2004, 7779, 143279, 5978, 262, 6675, 23670, 10802, 51569, 2113, 8767, 7458, 865, 3840, 51068, 10276, 24145, 51330, 9686, 1147, 5743, 167153, 221710, 84365, 53371, 54149, 6566
KRAS.LUNG.BREAST_UP.V1_UP	0.00819672	0.0334996	-0.400228	-1.48254	119	2920, 51454, 3576, 330, 3624, 9732, 2919, 6616, 6781, 2921, 7128, 101, 3673, 50863, 7869, 2113, 5649, 9971, 7185, 6364, 5743, 4318, 55001, 1437, 51193, 10253, 2556, 196475
PDGF_UP.V1_UP	0.00990099	0.039604	-0.381383	-1.45372	141	10447, 7980, 3777, 830, 3624, 1021, 54898, 374, 8754, 7071, 85458, 2791, 57515, 151011, 54454, 7779, 6675, 1647, 84124, 9841, 27257, 3267, 317662, 4999, 4893, 24145, 9604, 467, 1960, 3454, 55233, 54541, 28232, 1026, 57187, 8535, 23545, 22926, 150094, 9816, 9320, 29899, 56650, 10294, 8560
RB_DN.V1_UP	0.0101523	0.0397631	0.379632	1.50953	136	51451, 8270, 115265, 5314, 51181, 6241, 6117, 6695, 8086, 347734, 191, 29988, 898, 2203, 1786, 11253, 131601, 54584, 26007, 7067, 5094, 55959, 4175, 84311, 54187, 9592, 8914, 29089, 58190, 2052, 9048, 80017, 1774, 7283, 113452, 6484, 100, 55701, 2015, 139716, 9538, 80169, 57026, 9675, 2886, 132160, 8438, 3925, 284439, 6422
ESC_J1_UP_EARLY.V1_UP	0.0106667	0.0409252	0.352677	1.4478	165	5270, 59084, 4616, 54463, 5025, 4355, 51573, 57020, 550, 57544, 29785, 64374, 145407, 1890, 5279, 9718, 128178, 79041, 3855, 7067, 10194, 79022, 8974, 2259, 1140, 4337, 57715, 80024, 1601, 114787, 27065, 133, 84270, 360, 6764, 2125, 26502, 55337, 55313, 2049, 5652, 4668, 2322, 91978, 57496, 79816, 10218, 23423
PRC2_EZH2_UP.V1_DN	0.0110935	0.0415522	-0.361951	-1.41706	180	3576, 4862, 23236, 64208, 650, 10584, 1300, 79846, 55117, 26575, 80228, 2069, 157567, 54677, 5154, 53826, 54852, 9818, 10560, 28962, 441024, 85352, 56521, 3673, 79772, 3601, 2861, 6249, 80323, 5569, 9625, 26146, 6322, 79693, 10371, 64167, 9949, 55296, 8942, 56172, 27075, 220, 55262, 669, 22926, 23366, 3766
MYC_UP.V1_DN	0.0112721	0.0415522	-0.368913	-1.42757	159	3554, 22795, 94241, 54809, 57154, 25897, 3656, 6498, 114769, 168544, 55785, 79780, 51062, 2069, 22911, 6857, 2921, 81844, 84056, 7461, 84542, 57523, 2185, 59339, 7127, 11067, 2635, 4909, 9762, 79630, 6364, 2894, 1992, 3606, 54933, 9867, 11223, 643650
BMI1_DN_MEL18_DN.V1_UP	0.0115512	0.0417619	-0.376394	-1.4347	141	3576, 330, 182, 3676, 3624, 57761, 23657, 56938, 323, 3783, 4907, 2919, 11221, 1435, 9076, 8828, 5069, 5420, 19, 9839, 50863, 10389, 79627, 9469, 1647, 3604, 444, 467, 50515, 8609, 5026, 6804, 7042, 56892, 85377, 22797, 55092, 7465, 29968, 10184, 3696, 150094, 3914, 683, 1437, 51193
BCAT_BILD_ET_AL_UP	0.0123762	0.0439006	0.49859	1.59649	42	8313, 652, 55362, 2683, 6813, 81, 811, 93185, 113178, 977, 84062, 4849, 1938, 11001, 6929, 94234, 6168, 6157, 91663
ERB2_UP.V1_UP	0.0131234	0.0454545	0.339596	1.42659	185	7852, 22891, 23508, 10577, 7138, 6533, 27242, 4059, 53635, 4597, 3691, 11045, 50617, 4351, 3306, 1906, 2026, 8612, 3913, 8659, 23596, 23180, 439921, 25979, 29763, 309, 8564, 79762, 3887, 2771, 80328, 113178, 5878, 3855, 8974, 726, 6277, 1601, 2052, 8729, 58473, 360, 8714, 7390, 2593
CAMP_UP.V1_UP	0.0132979	0.0454545	0.343467	1.45018	192	23640, 51310, 94005, 9500, 292, 9361, 124454, 1798, 8086, 113829, 2745, 64374, 11316, 9674, 8402, 5034, 11190, 1890, 81788, 26580, 51295, 6396, 29927, 3069, 5479, 1209, 9416, 1351, 4502, 10410, 10036, 79711, 3276, 10296, 552889, 6142, 5036, 80017, 4141, 4835, 54732, 115098, 10524, 80315, 498, 252839, 517, 9798, 55168, 1535, 1431, 5875, 8891, 51011, 54987, 5018, 4723, 50, 16, 29926, 6184, 3608, 86…
HINATA_NFKB_IMMU_INF	0.0142857	0.0479592	-0.655955	-1.64644	16	2920, 6347, 3576, 2921, 7127, 6364
